# Supplementary material for: Advantages of using a fast urban canopy model as compared to a full mesoscale model to simulate the urban heat island of Barcelona
Source: Copernicus journal article supplement (doi:10.5194/gmd-2016-10), 2016-02-09
Supplement: Supplementary file 1 [file gmd-2016-10-supplement.pdf]

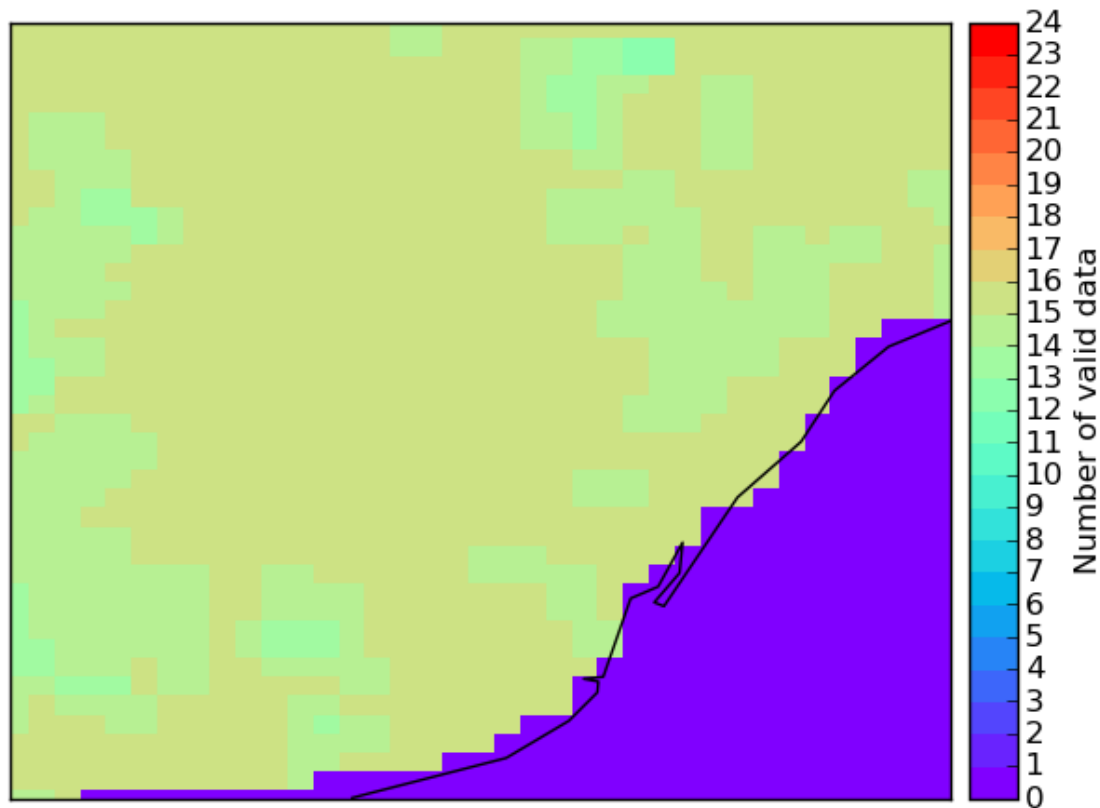

Supplementary figure 1. Number of valid MODIS data after quality control in each gridpoint, between May-September 2011, during night hours.
